# Supplementary material
Source: PubMed Central journal article supplement (PMC7680011)
Supplement: BPH-177-5375-s001.pdf [file BPH-177-5375-s001.pdf]

## Supplementary information

### **A chalcone derivative, 1m-6, exhibits atheroprotective effects by increasing cholesterol efflux and reducing inflammation-induced endothelial dysfunction**

Liv Weichien Chen<sup>1,†</sup>, Min-Chien Tsai<sup>2,†</sup>, Ching-Yuh Chern<sup>3</sup>, Tien-Ping Tsao<sup>1,4</sup>, Feng-Yen Lin<sup>5</sup>, Sy-Jou Chen<sup>6</sup>, Pi-Fen Tsui<sup>7</sup>, Yao-Wen Liu<sup>1</sup>, Hsien-Jui Lu<sup>3</sup>, Wan-Lin Wu<sup>8</sup>, Wei-Shiang Lin<sup>1</sup>, Chien-Sung Tsai<sup>9,10</sup>, and Chin-Sheng Lin<sup>1,\*</sup>

<sup>1</sup> Division of Cardiology, Department of Medicine, Tri-Service General Hospital, National Defense Medical Center, Taipei 11490, Taiwan; <sup>2</sup> Department of Physiology and Biophysics, Graduate Institute of Physiology, National Defense Medical Center, Taipei 11490, Taiwan; <sup>3</sup> Department of Applied Chemistry, National Chiayi University, Chiayi City 60004, Taiwan; <sup>4</sup> Division of Cardiology, Cheng Hsin General Hospital, Taipei 11220, Taiwan; <sup>5</sup> Taipei Heart Research Institute and Departments of Internal Medicine, Taipei Medical University, Taipei 11031, Taiwan; <sup>6</sup> Division of Cardiology and Cardiovascular Research Center, Department of Internal Medicine, Taipei Medical University Hospital, Taipei 11031, Taiwan; <sup>7</sup> Department of Emergency Medicine, Tri-Service General Hospital, National Defense Medical Center, Taipei 11490, Taiwan <sup>8</sup> Graduate Institute of Life Sciences, National Defense Medical Center, Taipei 11490, Taiwan <sup>9</sup> Department of Molecular Microbiology and Immunology, Keck School of Medicine, University of Southern California, Los Angeles, CA 90033, USA; <sup>10</sup> Division of Cardiovascular Surgery, Tri-Service General Hospital, National Defense Medical Center, Taipei 11490, Taiwan; <sup>11</sup> Department and Graduate Institute of Pharmacology, National Defense Medical Center 11490, Taipei; <sup>12</sup> Institute of Pharmacy, I.M. Sechenov First Moscow State Medical University, Moscow 119991, Russia

\*Correspondence to: Dr. Chin-Sheng Lin, Division of Cardiology, Tri-Service General Hospital, No. 325, Sec. 2, Cheng-Kung Rd., Neihu 114, Taipei, Taiwan. Tel: 886-2-8792-7160; FAX: 886-2-6601-2656; E-mail: littlelines@gmail.com

## Supplementary Figures and Tables:

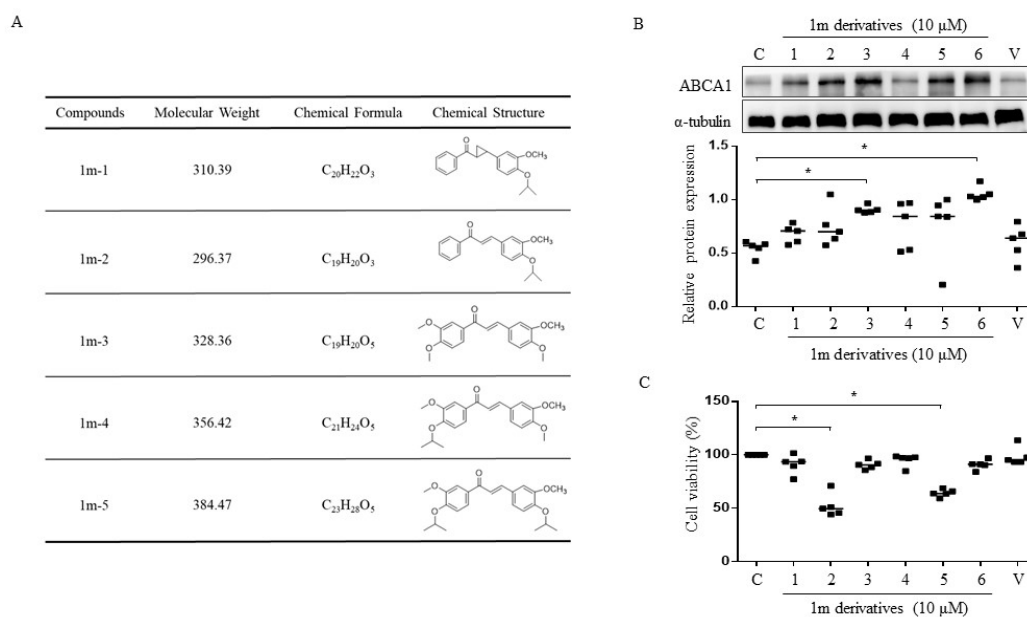

**Supplementary Fig 1. Effects of 1m derivatives on ABCA1 expression in human THP-1 macrophages.** (A) List of 1m derivatives. (B) Human THP-1 macrophages were treated with 1m derivatives or DMSO for 24 h. Cell lysates were collected and analyzed by western blot assay. Representative data and quantitative results expressed as the median with individual data of five independent experiments are shown. (C) Human THP-1 macrophages were treated with 1m derivatives or DMSO for 24 h and then incubated with MTT for another 6 h. Cell viability was measured using an ELISA reader. The results from five independent experiments are presented as the median with individual data. C indicates cells with no treatment. V indicates the vehicle (DMSO) control. The numbers, including 1 to 6, indicate 1m-1 to 1m-6. Significance is presented as \*  $p < 0.05$  versus the indicated group.

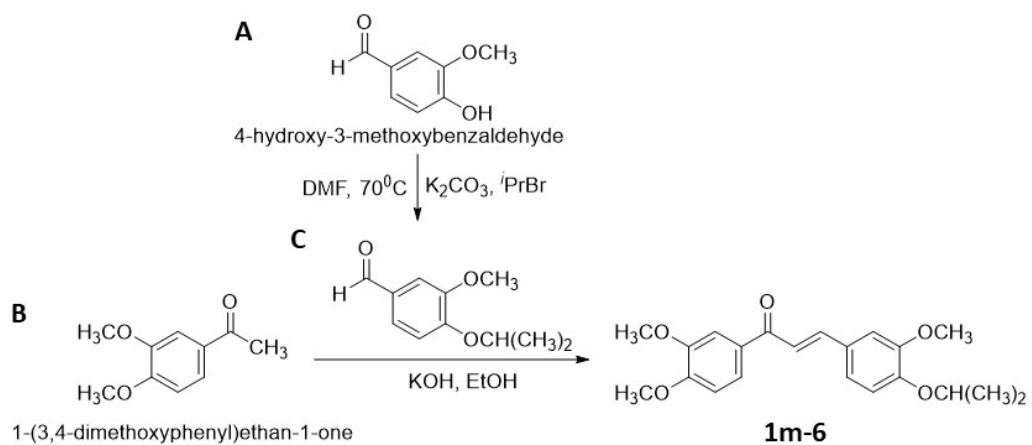

**Supplementary Fig 2. The synthesis of 1m-6.**

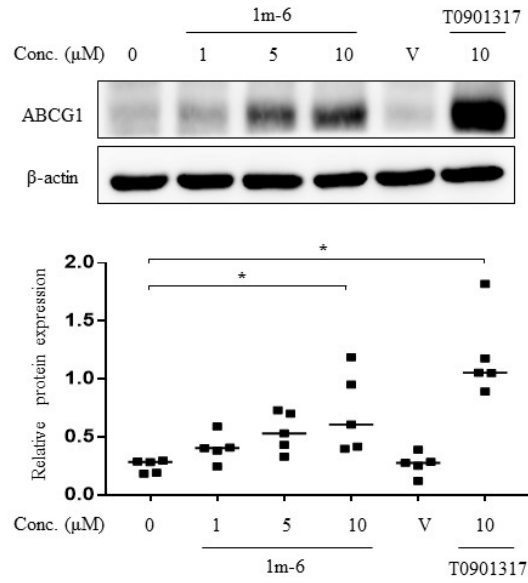

**Supplementary Fig 3. Effects of 1m-6 on ABCG1 expression in human THP-1 macrophages.** Human THP-1 macrophages were treated with 1m-6 (1, 5, and 10  $\mu$ M), T0901317 (10  $\mu$ M) or DMSO for 24 h. Cell lysates were collected and analyzed by western blot. Representative data and quantitative results of five independent experiments expressed as the median with individual data are shown. Conc. indicates concentration. V indicates the vehicle (DMSO) control. Significance is presented as \*  $p < 0.05$  versus the indicated group.

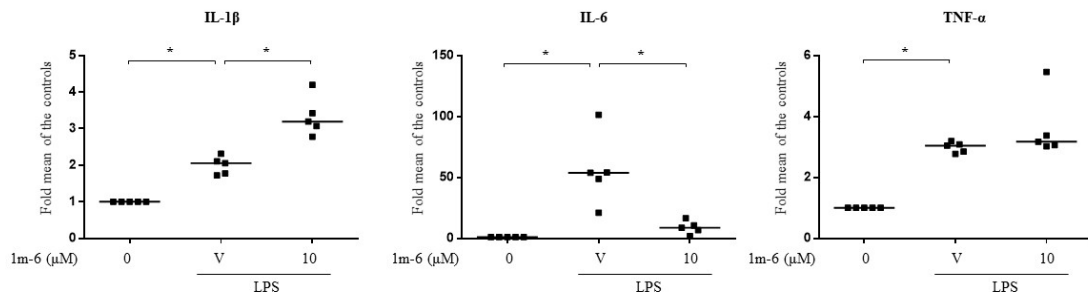

**Supplementary Fig 4. Effects of 1m-6 on lipopolysaccharides (LPS)-induced cytokine production in human THP-1 macrophages.** Human THP-1 macrophages were pre-treated with 10  $\mu$ M 1m-6 or DMSO for 2 h, and then stimulated with LPS (100 ng/ml) for 24 h. Cellular RNA was collected for qRT-PCR analysis. Data are shown as the median with individual data of five independent experiments. V indicates the vehicle (DMSO) control. Significance is presented as \*  $p < 0.05$  versus the indicated group.

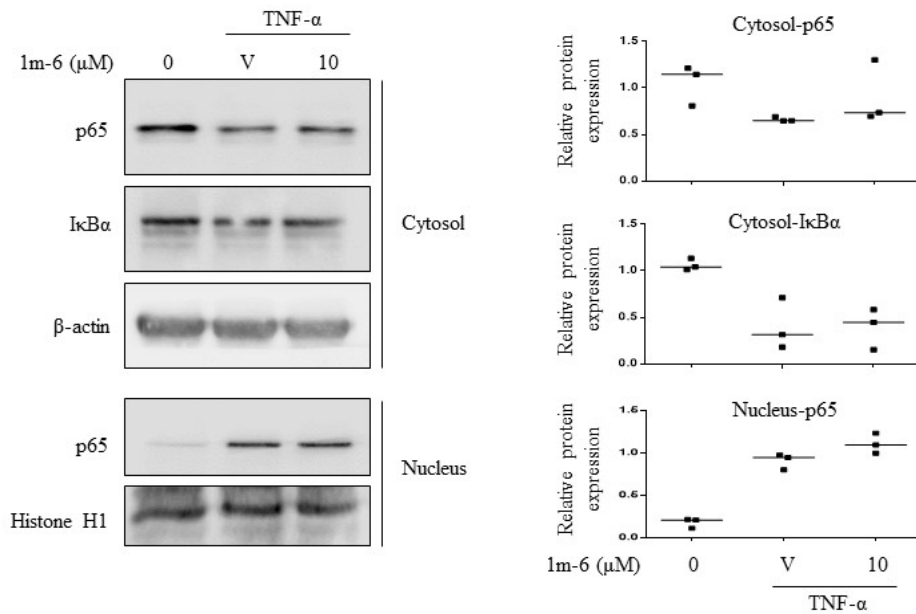

**Supplementary Fig 5. 1m-6 does not inhibit TNF- $\alpha$ -activated NF- $\kappa$ B signaling in HUVECs.** HUVECs were pretreated with 10  $\mu$ M 1m-6 or DMSO for 2 h and further stimulated with 10 ng/ml TNF- $\alpha$  for 30 minutes. The cytosol and nucleus cell lysates were collected using NE-PER™ Nuclear and Cytoplasmic Extraction Reagents (Thermo Scientific; Rockford, IL, USA) and analyzed by western blot. Representative data and quantitative results expressed as the median with individual data of three independent experiments are shown. V indicates the vehicle (DMSO) control. Significance is presented as \*  $p < 0.05$  versus the indicated group.

**Supplementary Table 1. The primer sequences used for the determination of mRNA expression in the real-time PCR experiments**

| Gene          | Accession number | Forward primer (5'-3')        | Reverse primer (5'-3')         |
|---------------|------------------|-------------------------------|--------------------------------|
| ABCA1         | NM_005502.3      | TGG CAG TGT CCA GCA TCT AA    | GTA TTG TAG CAT GTT GGC GTG T  |
| ABCG1         | NM_207629.1      | CGG GGA AAA GTC TGC AAT       | GGT GCC AAA GAA AAG GGT        |
| LXR $\alpha$  | NM_005693.3      | AAG CCC TGC ATG CCT ACG T     | TGC AGA CGC AGT GCA AAC A      |
| SREBP1        | NM_001005291.3   | CCA TGG ATT GCA CTT TCG AA    | GGC CAG GGA AGT CAC TGT CT     |
| MCP-1         | NM_002982.3      | TGC AGA GGC TCG CGA GCT A     | CAG GTG GTC CAT GGA ATC CTG A  |
| RANTES        | NM_002985.3      | CTC CCC ATA TTC CTC GGA CA    | GTT GAT GTA CTC CCG AAC CC     |
| HO-1          | NM_002133.3      | GGG TGA TAG AAG AGG CCA AGA   | AGC TCC TGC AAC TCC TCA AA     |
| VCAM-1        | NM_080682.2      | CCG GAT TGC TGC TCA GAT TGG A | AGC GTG GAA TTG GTC CCC TCA    |
| ICAM-1        | NM_001544.5      | GGC CTC AGT CAG TGT GA        | AAC CCC ATT CAG CGT CA         |
| IL-1 $\beta$  | NM_000576.3      | CAC GAT GCA CCT GTA CGA TCA   | GTT GCT CCA TAT CCT GTC CCT    |
| IL-6          | NM_000600.5      | CCA GGA GCC CAG CTA TGA AC    | CCC AGG GAG AAG GCA ACT G      |
| IL-8          | NM_000584.4      | TTG GCA GCC TTC CTG ATT TC    | TCT TTA GCA CTC CTT GGC AAA AC |
| TNF- $\alpha$ | NM_000594.4      | CCC ATG TTG TAG CAA ACC CTC   | TAT CTC TCA GCT CCA CGC CA     |
| STAT3         | NM_139276.2      | CTG CCC CAT ACC TGA AGA CC    | AGG TGA GGG ACT CAA ACT GC     |
| GAPDH         | NM_001289745.2   | ATG GGG AAG GTG AAG GTC G     | TAA AAG CAG CCC TGG TGA CC     |

**Supplementary Table 2. The primer sequences used for determination of miRNA expression in the real-time PCR experiments**

| Gene     | Accession number | Primer (5'-3')                 |
|----------|------------------|--------------------------------|
| RNU6-2   | NR_125730.1      | ACG CAA ATT CGT GAA GCG TT     |
| miR-10b  | NR_029609.1      | TAC CCT GTA GAA CCG AAT TTG T  |
| miR-27a  | NR_029501.1      | TTC ACA GTG GCT AAG TTC CGC    |
| miR-33   | NR_029507.1      | CAA TGT TTC CAC AGT GCA TCA C  |
| miR-106b | NR_029831.1      | CCG CAC TGT GGG TAC TTG CTG C  |
| miR-128  | NR_029824.1      | GGG GGC CGA TAC ACT GTA CGA GA |
| miR-148a | NR_029597.1      | TCA GTG CAC TAC AGA ACT TTG T  |
| miR-145  | NR_029686.1      | GGA TTC CTG GAA ATA CTG TTC T  |
| miR-155  | NR_030784.1      | CTC CTA CAT ATT AGC ATT AAC A  |
| miR-206  | NR_029713.1      | TGG AAT GTA AGG AAG TGT GTG G  |
| miR-758  | NR_030406.1      | TTT GTG ACC TGG TCC ACT AAC C  |
